# Supplementary material for: Molecular Epidemiology of Shiga Toxin-Producing Escherichia coli (STEC) on New Zealand Dairy Farms: Application of a Culture-Independent Assay and Whole-Genome Sequencing
Source: PubMed Central journal article supplement (PMC6029106; doi:10.1128/aem.00481-18), 2018-07-02
Supplement: AEM.00481-18_zam014188630s1.pdf [file AEM.00481-18_zam014188630s1.pdf]

---

## Supplemental Materials

---

Table S1: Detection of ‘Top 7’ STEC in calves (n=1508) on farms (n=102) by number of ‘Top 7’ STEC serogroups detected

| <b>Farm ID</b> | <b>Calves with no 'Top 7' STEC detected</b> | <b>Calves with one 'Top 7' STEC detected</b> | <b>Calves with two 'Top 7' STEC detected</b> | <b>Calves with three 'Top 7' STEC detected</b> |
|----------------|---------------------------------------------|----------------------------------------------|----------------------------------------------|------------------------------------------------|
| VCF1           | 15                                          |                                              |                                              |                                                |
| VCF2           | 15                                          |                                              |                                              |                                                |
| VCF3           | 14                                          | 1                                            |                                              |                                                |
| VCF4           | 10                                          | 4                                            | 1                                            |                                                |
| VCF5           | 13                                          | 2                                            |                                              |                                                |
| VCF6           | 12                                          |                                              | 3                                            |                                                |
| VCF7           | 13                                          | 2                                            |                                              |                                                |
| VCF8           | 14                                          | 1                                            |                                              |                                                |
| VCF9           | 14                                          | 1                                            |                                              |                                                |
| VCF10          | 15                                          |                                              |                                              |                                                |
| VCF11          | 13                                          | 2                                            |                                              |                                                |
| VCF12          | 15                                          |                                              |                                              |                                                |
| VCF13          | 13                                          | 2                                            |                                              |                                                |
| VCF14          | 14                                          | 1                                            |                                              |                                                |
| VCF15          | 9                                           | 5                                            | 1                                            |                                                |
| VCF16          | 4                                           | 10                                           | 1                                            |                                                |
| VCF17          | 12                                          | 3                                            |                                              |                                                |
| VCF18          | 8                                           | 4                                            | 3                                            |                                                |
| VCF19          | 12                                          | 2                                            | 1                                            |                                                |
| VCF20          | 1                                           | 9                                            | 4                                            | 1                                              |
| VCF21          |                                             | 3                                            | 7                                            | 5                                              |
| VCF22          | 11                                          | 2                                            | 1                                            | 1                                              |
| VCF23          | 15                                          |                                              |                                              |                                                |
| VCF24          | 15                                          |                                              |                                              |                                                |
| VCF25          | 15                                          |                                              |                                              |                                                |
| VCF26          | 10                                          | 3                                            | 2                                            |                                                |
| VCF27          | 3                                           | 10                                           | 2                                            |                                                |

|       |    |   |   |   |
|-------|----|---|---|---|
| VCF28 | 13 | 1 | 1 |   |
| VCF29 | 14 | 1 |   |   |
| VCF30 | 14 | 1 |   |   |
| VCF31 | 9  | 6 |   |   |
| VCF32 | 8  | 3 | 3 | 1 |
| VCF33 | 15 |   |   |   |
| VCF34 | 11 | 3 | 1 |   |
| VCF35 | 9  | 3 | 3 |   |
| VCF36 | 13 | 2 |   |   |
| VCF37 | 8  | 2 | 4 | 1 |
| VCF38 | 13 | 2 |   |   |
| VCF39 | 12 | 3 |   |   |
| VCF40 | 15 |   |   |   |
| VCF41 | 15 |   |   |   |
| VCF42 | 14 | 1 |   |   |
| VCF43 | 10 | 1 | 1 |   |
| VCF44 | 15 |   |   |   |
| VCF45 | 15 |   |   |   |
| VCF46 | 15 |   |   |   |
| VCF47 | 11 | 3 | 1 |   |
| VCF48 | 12 | 3 |   |   |
| VCF49 | 15 |   |   |   |
| VCF50 | 15 |   |   |   |
| VCF51 | 13 | 2 |   |   |
| VCF52 | 14 |   | 1 |   |
| VCF53 | 14 | 1 |   |   |
| VCF54 | 13 | 2 |   |   |
| VCF55 | 13 | 2 |   |   |
| VCF56 | 5  | 5 | 3 | 2 |
| VCF57 | 8  | 2 | 5 |   |
| VCF58 | 10 | 4 | 1 |   |
| VCF59 | 9  | 4 | 2 |   |
| VCF60 | 15 |   |   |   |
| VCF61 | 14 | 1 |   |   |
| VCF62 | 15 |   |   |   |
| VCF63 | 9  | 4 |   |   |

|       |    |   |   |   |
|-------|----|---|---|---|
| VCF64 | 5  | 4 | 6 |   |
| VCF65 | 14 | 1 |   |   |
| VCF66 | 15 |   |   |   |
| VCF67 | 8  |   |   |   |
| VCF68 | 14 | 1 |   |   |
| VCF69 | 13 | 2 |   |   |
| VCF70 | 15 |   |   |   |
| VCF71 | 7  | 8 |   |   |
| VCF72 | 11 | 4 |   |   |
| VCF73 | 15 |   |   |   |
| VCF74 | 15 |   |   |   |
| VCF75 | 13 | 2 |   |   |
| VCF76 | 11 | 2 | 1 |   |
| VCF77 | 11 | 3 | 1 |   |
| VCF78 | 15 |   |   |   |
| VCF79 | 15 |   |   |   |
| VCF80 | 11 | 2 | 2 |   |
| VCF81 | 9  | 6 |   |   |
| VCF82 | 14 | 1 |   |   |
| VCF83 | 14 | 1 |   |   |
| VCF84 | 12 | 3 |   |   |
| VCF85 | 11 | 4 |   |   |
| VCF86 | 6  |   |   |   |
| VCF87 | 11 | 4 |   |   |
| VCF88 | 13 | 2 |   |   |
| VCF89 | 9  | 3 | 2 | 1 |
| VCF90 | 13 | 1 | 1 |   |
| VCF91 | 13 | 1 |   | 1 |
| VCF92 | 15 |   |   |   |
| VCF93 | 7  | 6 | 2 |   |
| VCF94 | 12 | 3 |   |   |
| VCF95 | 11 | 2 | 2 |   |
| VCF96 | 8  | 4 | 3 |   |
| VCF97 | 13 |   | 2 |   |
| VCF98 | 14 |   | 1 |   |
| VCF99 | 11 | 4 |   |   |

|        |      |     |    |    |
|--------|------|-----|----|----|
| VCF100 | 7    | 7   | 1  |    |
| VCF101 | 12   | 3   |    |    |
| VCF102 | 11   | 4   |    |    |
| Totals | 1202 | 217 | 76 | 13 |

Table S2: Logistic mixed effects regression model of factors associated with prevalence of any STEC O26

| <b>Factor</b>                                               | <b>OR</b> | <b>95% CI</b> | <b>p-value</b> |
|-------------------------------------------------------------|-----------|---------------|----------------|
| <b>Number of calves</b> in calf pen<br>(increase of 1 calf) | 1.07      | 1.02, 1.13    | 0.012*         |

\*Significant variable (p<0.05)

Random Effects Variance: Pen within Farm (Variance = 3.26), Farm (Variance = 33.36)

Table S3: Logistic mixed effects regression model of factors associated with prevalence of any STEC O103

| <b>Factor</b>                                                                                            | <b>OR</b> | <b>95% CI</b> | <b>p-value</b> |
|----------------------------------------------------------------------------------------------------------|-----------|---------------|----------------|
| <b>Humidity:</b> Inside calf pen vs. outside the calf housing area<br>(increase of 1% relative humidity) | 1.02      | 1.01, 1.03    | 0.002*         |
| <b>High ammonia in calf pen</b> (subjective measurement)                                                 | 1.17      | 1.00, 1.36    | 0.047*         |

\*Significant variable (p<0.05)

Random Effects Variance: Pen within Farm (Variance = 4.49), Farm (Variance = 0.90)

Table S4: Logistic mixed effects regression model of factors associated with prevalence of any STEC O145

| <b>Factor</b>                                                                         | <b>OR</b> | <b>95% CI</b> | <b>p-value</b> |
|---------------------------------------------------------------------------------------|-----------|---------------|----------------|
| <b>Region</b> (compared to Canterbury)                                                |           |               | 0.002#         |
| Northland                                                                             | 1.38      | 1.15, 1.66    | <0.001*        |
| Waikato                                                                               | 0.98      | 0.84, 1.14    | 0.805          |
| Taranaki                                                                              | 1.01      | 0.85, 1.20    | 0.886          |
| Manawatu-Wellington                                                                   | 1.03      | 0.86, 1.24    | 0.742          |
| Southland                                                                             | 1.02      | 0.85, 1.23    | 0.811          |
| <b>Number of calves</b> in calf pen (increase of 1 calf)                              | 1.04      | 0.999, 1.08   | 0.059†         |
| <b>Age:</b> Young calves (2 to 9 days of age) vs. older calves (10 to 21 days of age) | 0.89      | 0.84, 0.95    | <0.001*        |

\*Significant variable (p<0.05)

#Likelihood-ratio test of variable as a whole

†Factor left in model as it approaches significant value

Random Effects Variance: Pen within farm (Variance = 1.56), Farm (Variance = 2.69)

Table S5: Sample size calculations for farms and calves with cluster-sample design effect (rho=3.6)

| <b>Estimated 'Top 7' STEC farm prevalence*</b> | <b>Farms needed</b> | <b>Calves per farm</b> | <b>Total samples</b> |
|------------------------------------------------|---------------------|------------------------|----------------------|
| 25%                                            | 53                  | 20                     | 1060                 |
| 25%                                            | 70                  | 15                     | 1050                 |
| 25%                                            | 105                 | 10                     | 1050                 |
| 20%                                            | 70                  | 20                     | 1400                 |
| 20%                                            | 93                  | 15                     | 1395                 |
| 20%                                            | 139                 | 10                     | 1390                 |
| 15%                                            | 99                  | 20                     | 1980                 |
| 15%                                            | 132                 | 15                     | 1980                 |
| 15%                                            | 197                 | 10                     | 1970                 |

\*Based on one animal being positive for any of the Top 7 STEC

Table S6: New Zealand dairy farms per region sampled and milking herd size, based on farm manager records

| <b>Region (number of farms)</b> | <b>Median herd size</b> | <b>Range*</b> |
|---------------------------------|-------------------------|---------------|
| Northland (10)                  | 210                     | 35 to 920     |
| Waikato (35)                    | 360                     | 120 to 960    |
| Taranaki (19)                   | 320                     | 140 to 560    |
| Manawatu-Wellington (12)        | 440                     | 320 to 1100   |
| Canterbury (14)                 | 800                     | 200 to 1960   |
| Southland (12)                  | 580                     | 440 to 980    |

\*Farms in three regions contained fewer than the target 150 milking herd size on the day of sampling; adequate numbers of calves were sampled

Table S7: Sensitivity of NeoSEEK and reverse transcriptase PCR assays for detection of Top 7 STEC serogroups in calf fecal enrichment samples (n=1,508)

| Serogroup | Sensitivity RT-PCR |                       | Sensitivity NeoSEEK |                       |
|-----------|--------------------|-----------------------|---------------------|-----------------------|
|           | Mean               | 95% credible interval | Mean                | 95% credible interval |
| O103      | 0.95               | 0.91-0.97             | 0.93                | 0.88-0.97             |
| O145      | 0.89               | 0.81-0.96             | 0.92                | 0.85-0.97             |
| O157      | 0.93               | 0.87-0.98             | 0.79                | 0.69-0.90             |
| O121      | 0.91               | 0.84-0.97             | 0.87                | 0.77-0.95             |
| O26       | 0.91               | 0.84-0.97             | 0.92                | 0.85-0.97             |
| O45       | 0.93               | 0.87-0.98             | 0.93                | 0.87-0.97             |
| O111      | 0.89               | 0.77-0.96             | 0.89                | 0.89-0.96             |

Table S8: Specificity of NeoSEEK and reverse transcriptase PCR assays for detection of Top 7 STEC serogroups in calf fecal enrichment samples (n=1,508)

| Serogroup | Specificity RT-PCR |           | Specificity NeoSEEK |           |
|-----------|--------------------|-----------|---------------------|-----------|
|           | Mean               | 95% CI    | Mean                | 95% CI    |
| O103      | 0.93               | 0.89-0.97 | 0.95                | 0.93-0.98 |
| O145      | 0.98               | 0.97-0.99 | 0.96                | 0.94-0.98 |
| O157      | 0.96               | 0.94-0.99 | 0.98                | 0.97-0.99 |
| O121      | 0.96               | 0.94-0.98 | 0.96                | 0.95-0.98 |
| O26       | 0.94               | 0.91-0.97 | 0.93                | 0.90-0.96 |
| O45       | 0.95               | 0.93-0.97 | 0.93                | 0.91-0.96 |
| O111      | 1.00               | 0.99-1.00 | 1.00                | 0.99-1.00 |



Table S9: BioProject PRJNA396667 metadata from raw sequence data used in this study, publicly available on the NCBI SRA archive

| BioSample accession | sample_name | collection_date | geo_loc_name                     | Isolation_source | lat_lon             | host              | host_age | host   | host_disease | serotype |
|---------------------|-------------|-----------------|----------------------------------|------------------|---------------------|-------------------|----------|--------|--------------|----------|
| SAMN07430764        | VC1139e     | 11-Sep-14       | New Zealand: Canterbury          | bovine           | 43.75 S<br>171.16 E | Bos taurus taurus | Calf     | VC1139 | Reservoir    | O26:H11  |
| SAMN07430765        | VC1140e     | 11-Sep-14       | New Zealand: Canterbury          | bovine           | 43.75 S<br>171.16 E | Bos taurus taurus | Calf     | VC1140 | Reservoir    | O26:H11  |
| SAMN07430766        | VC1186e     | 15-Sep-14       | New Zealand: Canterbury          | bovine           | 43.75 S<br>171.16 E | Bos taurus taurus | Calf     | VC1186 | Reservoir    | O26:H11  |
| SAMN07430767        | VC1187e     | 15-Sep-14       | New Zealand: Canterbury          | bovine           | 43.75 S<br>171.16 E | Bos taurus taurus | Calf     | VC1187 | Reservoir    | O26:H11  |
| SAMN07430768        | VC1190e     | 15-Sep-14       | New Zealand: Canterbury          | bovine           | 43.75 S<br>171.16 E | Bos taurus taurus | Calf     | VC1190 | Reservoir    | O26:H11  |
| SAMN07430769        | VC1195e     | 15-Sep-14       | New Zealand: Canterbury          | bovine           | 43.75 S<br>171.16 E | Bos taurus taurus | Calf     | VC1195 | Reservoir    | O26:H11  |
| SAMN07430770        | VC1196e     | 15-Sep-14       | New Zealand: Canterbury          | bovine           | 43.75 S<br>171.16 E | Bos taurus taurus | Calf     | VC1196 | Reservoir    | O26:H11  |
| SAMN07430771        | VC1202e     | 15-Sep-14       | New Zealand: Canterbury          | bovine           | 43.75 S<br>171.16 E | Bos taurus taurus | Calf     | VC1202 | Reservoir    | O26:H11  |
| SAMN07430772        | VC1309e     | 17-Sep-14       | New Zealand: Canterbury          | bovine           | 43.75 S<br>171.16 E | Bos taurus taurus | Calf     | VC1309 | Reservoir    | O26:H11  |
| SAMN07430773        | VC1310e     | 17-Sep-14       | New Zealand: Canterbury          | bovine           | 43.75 S<br>171.16 E | Bos taurus taurus | Calf     | VC1310 | Reservoir    | O26:H11  |
| SAMN07430774        | VC1311e     | 17-Sep-14       | New Zealand: Canterbury          | bovine           | 43.75 S<br>171.16 E | Bos taurus taurus | Calf     | VC1311 | Reservoir    | O26:H11  |
| SAMN07430783        | VC833e      | 27-Aug-14       | New Zealand: Manawatu-Wellington | bovine           | 39.73 S<br>175.44 E | Bos taurus taurus | Calf     | VC833  | Reservoir    | O26:H11  |
| SAMN07430784        | VC833f      | 27-Aug-14       | New Zealand: Manawatu-Wellington | bovine           | 39.73 S<br>175.44 E | Bos taurus taurus | Calf     | VC833  | Reservoir    | O26:H11  |
| SAMN07430785        | VC833g      | 27-Aug-14       | New Zealand: Manawatu-Wellington | bovine           | 39.73 S<br>175.44 E | Bos taurus taurus | Calf     | VC833  | Reservoir    | O26:H11  |
| SAMN07430786        | VC833h      | 27-Aug-14       | New Zealand: Manawatu-Wellington | bovine           | 39.73 S<br>175.44 E | Bos taurus taurus | Calf     | VC833  | Reservoir    | O26:H11  |

|              |         |           |                                  |        |                     |                   |      |        |           |         |
|--------------|---------|-----------|----------------------------------|--------|---------------------|-------------------|------|--------|-----------|---------|
| SAMN07430787 | VC836e  | 27-Aug-14 | New Zealand: Manawatu-Wellington | bovine | 39.73 S<br>175.44 E | Bos taurus taurus | Calf | VC836  | Reservoir | O26:H11 |
| SAMN07430788 | VC837e  | 27-Aug-14 | New Zealand: Manawatu-Wellington | bovine | 39.73 S<br>175.44 E | Bos taurus taurus | Calf | VC837  | Reservoir | O26:H11 |
| SAMN07430810 | VC1362e | 22-Sep-14 | New Zealand: Southland           | bovine | 45.85 S<br>167.68 E | Bos taurus taurus | Calf | VC1362 | Reservoir | O26:H11 |
| SAMN07430811 | VC1366e | 22-Sep-14 | New Zealand: Southland           | bovine | 45.85 S<br>167.68 E | Bos taurus taurus | Calf | VC1366 | Reservoir | O26:H11 |
| SAMN07430812 | VC1367e | 22-Sep-14 | New Zealand: Southland           | bovine | 45.85 S<br>167.68 E | Bos taurus taurus | Calf | VC1367 | Reservoir | O26:H11 |
| SAMN07430813 | VC1394e | 23-Sep-14 | New Zealand: Southland           | bovine | 45.85 S<br>167.68 E | Bos taurus taurus | Calf | VC1394 | Reservoir | O26:H11 |
| SAMN07430814 | VC1395e | 23-Sep-14 | New Zealand: Southland           | bovine | 45.85 S<br>167.68 E | Bos taurus taurus | Calf | VC1395 | Reservoir | O26:H11 |
| SAMN07430815 | VC1395f | 23-Sep-14 | New Zealand: Southland           | bovine | 45.85 S<br>167.68 E | Bos taurus taurus | Calf | VC1395 | Reservoir | O26:H11 |
| SAMN07430816 | VC1395g | 23-Sep-14 | New Zealand: Southland           | bovine | 45.85 S<br>167.68 E | Bos taurus taurus | Calf | VC1395 | Reservoir | O26:H11 |
| SAMN07430817 | VC1396e | 23-Sep-14 | New Zealand: Southland           | bovine | 45.85 S<br>167.68 E | Bos taurus taurus | Calf | VC1396 | Reservoir | O26:H11 |
| SAMN07430818 | VC1403e | 23-Sep-14 | New Zealand: Southland           | bovine | 45.85 S<br>167.68 E | Bos taurus taurus | Calf | VC1403 | Reservoir | O26:H11 |
| SAMN07430819 | VC1471e | 24-Sep-14 | New Zealand: Southland           | bovine | 45.85 S<br>167.68 E | Bos taurus taurus | Calf | VC1471 | Reservoir | O26:H11 |
| SAMN07430820 | VC1471f | 24-Sep-14 | New Zealand: Southland           | bovine | 45.85 S<br>167.68 E | Bos taurus taurus | Calf | VC1471 | Reservoir | O26:H11 |
| SAMN07430821 | VC1471g | 24-Sep-14 | New Zealand: Southland           | bovine | 45.85 S<br>167.68 E | Bos taurus taurus | Calf | VC1471 | Reservoir | O26:H11 |
| SAMN07430822 | VC1471h | 24-Sep-14 | New Zealand: Southland           | bovine | 45.85 S<br>167.68 E | Bos taurus taurus | Calf | VC1471 | Reservoir | O26:H11 |
| SAMN07430823 | VC1473e | 24-Sep-14 | New Zealand: Southland           | bovine | 45.85 S<br>167.68 E | Bos taurus taurus | Calf | VC1473 | Reservoir | O26:H11 |
| SAMN07430824 | VC1474e | 24-Sep-14 | New Zealand: Southland           | bovine | 45.85 S<br>167.68 E | Bos taurus taurus | Calf | VC1474 | Reservoir | O26:H11 |
| SAMN07430825 | VC1486e | 24-Sep-14 | New Zealand: Southland           | bovine | 45.85 S<br>167.68 E | Bos taurus taurus | Calf | VC1486 | Reservoir | O26:H11 |

|              |         |           |                       |        |                     |                   |      |        |           |         |
|--------------|---------|-----------|-----------------------|--------|---------------------|-------------------|------|--------|-----------|---------|
| SAMN07430840 | VC1113e | 4-Sep-14  | New Zealand: Taranaki | bovine | 39.35 S<br>174.44 E | Bos taurus taurus | Calf | VC1113 | Reservoir | O26:H11 |
| SAMN07430841 | VC1122f | 4-Sep-14  | New Zealand: Taranaki | bovine | 39.35 S<br>174.44 E | Bos taurus taurus | Calf | VC1122 | Reservoir | O26:H11 |
| SAMN07430842 | VC1125e | 4-Sep-14  | New Zealand: Taranaki | bovine | 39.35 S<br>174.44 E | Bos taurus taurus | Calf | VC1125 | Reservoir | O26:H11 |
| SAMN07430843 | VC880e  | 1-Sep-14  | New Zealand: Taranaki | bovine | 39.35 S<br>174.44 E | Bos taurus taurus | Calf | VC880  | Reservoir | O26:H11 |
| SAMN07430844 | VC932f  | 1-Sep-14  | New Zealand: Taranaki | bovine | 39.35 S<br>174.44 E | Bos taurus taurus | Calf | VC932  | Reservoir | O26:H11 |
| SAMN07430845 | VC936e  | 1-Sep-14  | New Zealand: Taranaki | bovine | 39.35 S<br>174.44 E | Bos taurus taurus | Calf | VC936  | Reservoir | O26:H11 |
| SAMN07430846 | VC940e  | 1-Sep-14  | New Zealand: Taranaki | bovine | 39.35 S<br>174.44 E | Bos taurus taurus | Calf | VC940  | Reservoir | O26:H11 |
| SAMN07430847 | VC943e  | 2-Sep-14  | New Zealand: Taranaki | bovine | 39.35 S<br>174.44 E | Bos taurus taurus | Calf | VC943  | Reservoir | O26:H11 |
| SAMN07430848 | VC943f  | 2-Sep-14  | New Zealand: Taranaki | bovine | 39.35 S<br>174.44 E | Bos taurus taurus | Calf | VC943  | Reservoir | O26:H11 |
| SAMN07430849 | VC943g  | 2-Sep-14  | New Zealand: Taranaki | bovine | 39.35 S<br>174.44 E | Bos taurus taurus | Calf | VC943  | Reservoir | O26:H11 |
| SAMN07430850 | VC943h  | 2-Sep-14  | New Zealand: Taranaki | bovine | 39.35 S<br>174.44 E | Bos taurus taurus | Calf | VC943  | Reservoir | O26:H11 |
| SAMN07430851 | VC946e  | 2-Sep-14  | New Zealand: Taranaki | bovine | 39.35 S<br>174.44 E | Bos taurus taurus | Calf | VC946  | Reservoir | O26:H11 |
| SAMN07430852 | VC951e  | 2-Sep-14  | New Zealand: Taranaki | bovine | 39.35 S<br>174.44 E | Bos taurus taurus | Calf | VC951  | Reservoir | O26:H11 |
| SAMN07430853 | VC955e  | 2-Sep-14  | New Zealand: Taranaki | bovine | 39.35 S<br>174.44 E | Bos taurus taurus | Calf | VC955  | Reservoir | O26:H11 |
| SAMN07430875 | VC396e  | 12-Aug-14 | New Zealand: Waikato  | bovine | 38.06 S<br>175.44 E | Bos taurus taurus | Calf | VC396  | Reservoir | O26:H11 |
| SAMN07430876 | VC397e  | 12-Aug-14 | New Zealand: Waikato  | bovine | 38.06 S<br>175.44 E | Bos taurus taurus | Calf | VC397  | Reservoir | O26:H11 |
| SAMN07430877 | VC401e  | 12-Aug-14 | New Zealand: Waikato  | bovine | 38.06 S<br>175.44 E | Bos taurus taurus | Calf | VC401  | Reservoir | O26:H11 |
| SAMN07430878 | VC452e  | 13-Aug-14 | New Zealand: Waikato  | bovine | 38.06 S<br>175.44 E | Bos taurus taurus | Calf | VC452  | Reservoir | O26:H11 |

|              |        |           |                      |        |                     |                   |      |       |           |         |
|--------------|--------|-----------|----------------------|--------|---------------------|-------------------|------|-------|-----------|---------|
| SAMN07430879 | VC456e | 13-Aug-14 | New Zealand: Waikato | bovine | 38.06 S<br>175.44 E | Bos taurus taurus | Calf | VC456 | Reservoir | O26:H11 |
| SAMN07430880 | VC459e | 13-Aug-14 | New Zealand: Waikato | bovine | 38.06 S<br>175.44 E | Bos taurus taurus | Calf | VC459 | Reservoir | O26:H11 |
| SAMN07430881 | VC473e | 13-Aug-14 | New Zealand: Waikato | bovine | 38.06 S<br>175.44 E | Bos taurus taurus | Calf | VC473 | Reservoir | O26:H11 |
| SAMN07430882 | VC474e | 13-Aug-14 | New Zealand: Waikato | bovine | 38.06 S<br>175.44 E | Bos taurus taurus | Calf | VC474 | Reservoir | O26:H11 |
| SAMN07430883 | VC474f | 13-Aug-14 | New Zealand: Waikato | bovine | 38.06 S<br>175.44 E | Bos taurus taurus | Calf | VC474 | Reservoir | O26:H11 |
| SAMN07430884 | VC474g | 13-Aug-14 | New Zealand: Waikato | bovine | 38.06 S<br>175.44 E | Bos taurus taurus | Calf | VC474 | Reservoir | O26:H11 |
| SAMN07430885 | VC474h | 13-Aug-14 | New Zealand: Waikato | bovine | 38.06 S<br>175.44 E | Bos taurus taurus | Calf | VC474 | Reservoir | O26:H11 |
| SAMN07430886 | VC476e | 13-Aug-14 | New Zealand: Waikato | bovine | 38.06 S<br>175.44 E | Bos taurus taurus | Calf | VC476 | Reservoir | O26:H11 |
| SAMN07430887 | VC477e | 13-Aug-14 | New Zealand: Waikato | bovine | 38.06 S<br>175.44 E | Bos taurus taurus | Calf | VC477 | Reservoir | O26:H11 |
| SAMN07430888 | VC479e | 13-Aug-14 | New Zealand: Waikato | bovine | 38.06 S<br>175.44 E | Bos taurus taurus | Calf | VC479 | Reservoir | O26:H11 |
| SAMN07430889 | VC545e | 18-Aug-14 | New Zealand: Waikato | bovine | 38.06 S<br>175.44 E | Bos taurus taurus | Calf | VC545 | Reservoir | O26:H11 |
| SAMN07430890 | VC547e | 18-Aug-14 | New Zealand: Waikato | bovine | 38.06 S<br>175.44 E | Bos taurus taurus | Calf | VC547 | Reservoir | O26:H11 |
| SAMN07430891 | VC550e | 18-Aug-14 | New Zealand: Waikato | bovine | 38.06 S<br>175.44 E | Bos taurus taurus | Calf | VC550 | Reservoir | O26:H11 |
| SAMN07430892 | VC554e | 18-Aug-14 | New Zealand: Waikato | bovine | 38.06 S<br>175.44 E | Bos taurus taurus | Calf | VC554 | Reservoir | O26:H11 |
| SAMN07430893 | VC555e | 18-Aug-14 | New Zealand: Waikato | bovine | 38.06 S<br>175.44 E | Bos taurus taurus | Calf | VC555 | Reservoir | O26:H11 |

Table S10: Location, animal, pen, and farm management factors evaluated against outcome variables of the Top 7 STEC prevalence in dairy calves

| <b>Risk Factor Level</b> | <b>Variable</b> | <b>Type</b> | <b>Notes</b>                                                                              | <b>Source of measurement</b>                     |
|--------------------------|-----------------|-------------|-------------------------------------------------------------------------------------------|--------------------------------------------------|
| <b>Location</b>          | Region          | Categorical | 6 regions                                                                                 |                                                  |
|                          | Elevation       | Continuous  | Meters                                                                                    | GPS device                                       |
|                          | Humidity        | Continuous  | Measured in open space no less than 5 meters from Pen                                     | Thermo-Hygrometer                                |
|                          | Temperature     | Continuous  | Measured in open space no less than 5 meters from Pen                                     | Thermo-Hygrometer                                |
| <b>Animal</b>            | Age             | Binary      | Young (2 to 9 days); Old (10 to 21 days)                                                  |                                                  |
|                          | Sex             | Binary      | Male, Female                                                                              |                                                  |
|                          | Breed           | Categorical |                                                                                           |                                                  |
|                          | Class           | Categorical | Bobby, Beef, Replacement                                                                  |                                                  |
|                          | FecalScore      | Ordinal     | Coverage of hide with fecal matter or mud: 1 (0-25%), 2 (25-50%), 3 (50-75%), 4 (75-100%) | Visual assessment of fecal contamination on hide |
| <b>Calf Pen</b>          | PenAnimalCount  | Continuous  | Number of calves in pen                                                                   |                                                  |
|                          | PenOrientation  | Categorical | Primary direction that pen faced; 8 cardinal points                                       | GPS device                                       |
|                          | PenHumidity     | Continuous  | Recorded in centre of pen                                                                 | Thermo-hygrometer                                |
|                          | PenTemperature  | Continuous  | Recorded in centre of pen                                                                 | Thermo-hygrometer                                |
|                          | PenType         | Categorical | Open, closed, or conversion                                                               |                                                  |
|                          | Floor           | Categorical | Flooring beneath substrate                                                                |                                                  |
|                          | Substrate       | Categorical | Type of substrate used as bedding for calves                                              |                                                  |

|                        |                       |            |                                                                                                       |                                                |
|------------------------|-----------------------|------------|-------------------------------------------------------------------------------------------------------|------------------------------------------------|
|                        | SubstrateCleaned      | Binary     | Whether substrate was cleaned during the calving season                                               |                                                |
|                        | SubstrateCleanedFreq  | Continuous | How often pen substrate was cleaned                                                                   |                                                |
|                        | SubstrateTopped       | Binary     | Was new pen substrate added during the season                                                         |                                                |
|                        | SubstrateToppedFreq   | Continuous | How often new substrate was added                                                                     |                                                |
|                        | SubstrateSprayed      | Binary     | Was the pen sprayed with disinfectant during the season                                               |                                                |
|                        | SubstrateSprayedFreq  | Continuous | How often pen was sprayed                                                                             |                                                |
|                        | PenFecalContamination | Ordinal    | 4 Groups: 0-25%, 25-50%, 50-75%, 75-100%                                                              | Visual assessment of fecal matter on pen floor |
|                        | PenAmmonia            | Binary     | Irritation of mucous membranes (nasal passage, eyes) to sampler (ASB)                                 |                                                |
|                        | TempInsideOutside     | Continuous | Temperature inside pen minus temperature outside the calf housing area (~10 meters from the building) |                                                |
|                        | HumidityInsideOutside | Continuous | Humidity inside pen minus humidity outside calf housing area (~10 meters from the building)           |                                                |
| <b>Farm Management</b> | MilkingHerdSize       | Continuous | Number of cows in milking herd                                                                        |                                                |
|                        | SpringCalvingSize     | Continuous | Number of cows in spring calving herd                                                                 |                                                |
|                        | DairyOnly             | Binary     | Only dairy cattle raised                                                                              |                                                |
|                        | BeefDairy             | Binary     | Beef and dairy cattle raised                                                                          |                                                |

|  |                         |             |                                                                      |  |
|--|-------------------------|-------------|----------------------------------------------------------------------|--|
|  | MeatCompany             | Categorical | Meat company used for veal calf processing                           |  |
|  | Pigs                    | Binary      | Presence of pigs on farm                                             |  |
|  | Deer                    | Binary      | Presence of deer on farm                                             |  |
|  | Sheep                   | Binary      | Presence of sheep on farm                                            |  |
|  | Goats                   | Binary      | Presence of goats on farm                                            |  |
|  | Horses                  | Binary      | Presence of horses on farm                                           |  |
|  | CalvesOtherFarms        | Binary      | Importation of calves from other farms in past two calving seasons   |  |
|  | CowsOtherFarms          | Binary      | Importation of cows from other farms in the past two calving seasons |  |
|  | CalvingDateSpring       | Date        | Planned start of winter calving                                      |  |
|  | CalvingDateAutumn       | Date        | Planned start of autumn calving (if applicable)                      |  |
|  | DaysSinceStartofCalving | Continuous  | Days from start of calving to day of sampling for study              |  |
|  | YearRoundCalving        | Binary      | Unseasonal calving management                                        |  |
|  | VectorFlies             | Binary      | Flies observed in Pens while sampling                                |  |
|  | VectorBirdDroppings     | Binary      | Bird droppings observed on surfaces in Pens while sampling           |  |
|  | VectorBirdNests         | Binary      | Bird nests observed in Pens while sampling                           |  |
|  | VectorsRodenticide      | Binary      | Farmer asked if they use rodenticide to control rodents              |  |
|  | BobbysPresent           | Binary      | Young veal calves in Pen while sampling                              |  |
|  | ReplacementsPresent     | Binary      | Young replacement calves in Pen while sampling                       |  |

|  |                          |            |                                                                    |  |
|--|--------------------------|------------|--------------------------------------------------------------------|--|
|  | BeefPresent              | Binary     | Young beef calves in Pen while sampling                            |  |
|  | BobbysIsolated           | Binary     | Young veal calves not mixed with other classes (replacement/beef)  |  |
|  | ReplacementsIsolated     | Binary     | Replacement calves isolated from other calves                      |  |
|  | BeefIsolated             | Binary     | Beef calves isolate from other calves                              |  |
|  | BobbysMixedReplacements  | Binary     | Young veal calves and replacements mixed together                  |  |
|  | BobbysMixedBeef          | Binary     | Young veal calves and beef calves mixed together                   |  |
|  | ReplacementsMixedBobbys  | Binary     | Replacement calves and young veal calves mixed together            |  |
|  | ReplacementsMixedBeef    | Binary     | Replacement calves and beef calves mixed together                  |  |
|  | BeefMixedReplacements    | Binary     | Beef calves and replacement calves mixed together                  |  |
|  | BeefMixedBobbys          | Binary     | Beef calves and young veal calves mixed together                   |  |
|  | BobbyDaysExport          | Continuous | Age of young veal calves when exported for veal meat processing    |  |
|  | ReplacementsDaysPastured | Continuous | Days replacement calves kept in Pens before putting out to pasture |  |
|  | BeefDaysPastured         | Continuous | Days beef calves kept in Pens before putting out to pasture        |  |
|  | BeefDaysExport           | Continuous | Age of beef calves when exported                                   |  |



|  |                            |             |                                                               |  |
|--|----------------------------|-------------|---------------------------------------------------------------|--|
|  | AdultsWeanlingsMixedCalves | Binary      | Do adult cattle or weaned calves have any contact with calves |  |
|  | DamBirthing                | Categorical | Location where Dams give birth to calves                      |  |
|  | DaysCalvesWithDam          | Continuous  | Days before calves removed from dams                          |  |
|  | Colostrum                  | Binary      | Directly from dam or mixed colostrum                          |  |
|  | ColostrumMethod            | Categorical | Orogastric tube or suckled from dam                           |  |
|  | MilkFresh                  | Binary      | Fresh milk given to calves                                    |  |
|  | MilkPowder                 | Binary      | Powdered milk given to calves                                 |  |
|  | MilkWaste                  | Binary      | Antibiotic milk given to calves                               |  |
|  | MilkColostrum              | Binary      | Colostrum fed to calves                                       |  |
|  | MilkContainer              | Categorical | Teat bucket or Open bucket for feeding                        |  |
|  | MilkFrequency              | Categorical | How many times calves fed a day                               |  |
|  | AdlibWater                 | Binary      | Water available for all calves in Pens                        |  |
|  | ConcentrateMeal            | Binary      | Feed concentrates provided to calves                          |  |
|  | ConcentrateHayStraw        | Binary      | Hay or straw provided to calves                               |  |
|  | ConcentrateClay            | Binary      | Clay additive provided to calves to prevent scours            |  |
|  | ConcentrateOther           | Categorical | Variety of other supplements used by farmers for calves       |  |
|  | ConcentrateStartFeedDay    | Continuous  | Day farmer started giving calves concentrates                 |  |
|  | ConcentratesBobby          | Binary      | Young veal calves received concentrate feed                   |  |

|  |                   |             |                                                                                                |  |
|--|-------------------|-------------|------------------------------------------------------------------------------------------------|--|
|  | WaterSource       | Categorical | Source of water on farm                                                                        |  |
|  | EffluentMethod    | Categorical | Spread on farmer's pasture or shipped out                                                      |  |
|  | EffluentFrequency | Continuous  | How often effluent spread on pastures                                                          |  |
|  | Grazier           | Binary      | Farmer ships out replacement calves to grazier, and then brings back once they grow to heifers |  |
|  | FeedPadHerdHome   | Binary      | Use of feed pad or herd home for adult cattle                                                  |  |

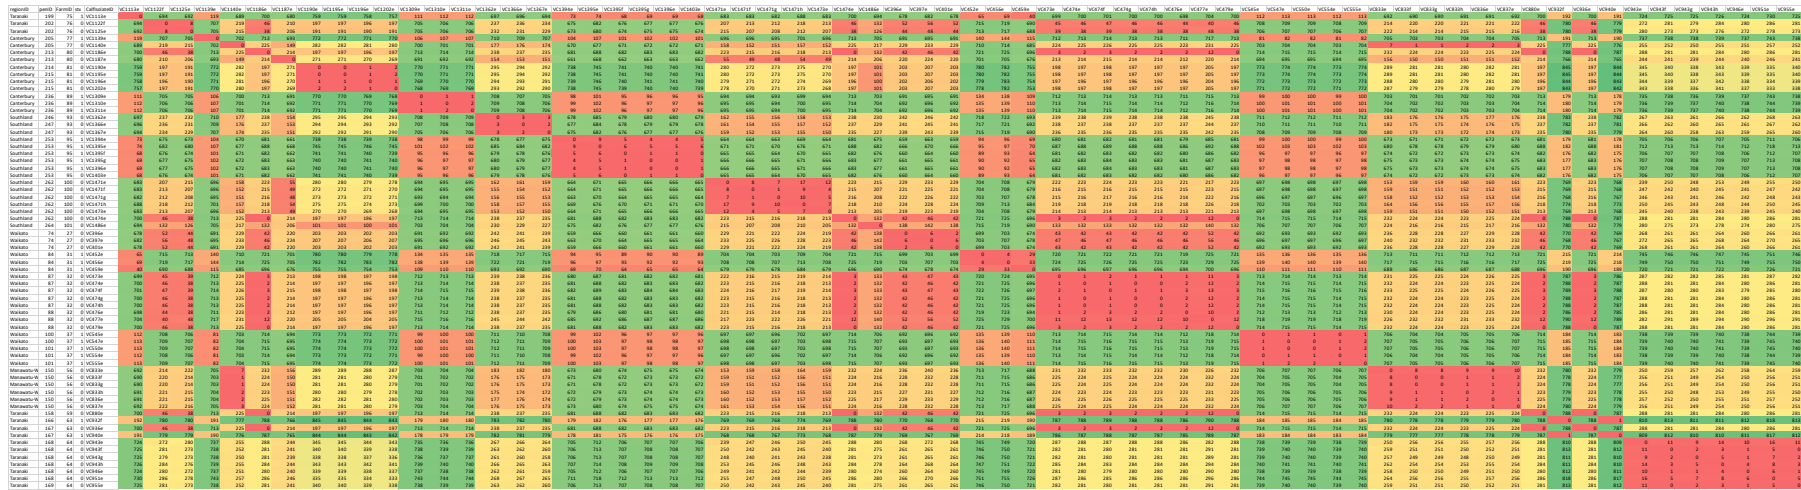

Figure S1: Heatmap of SNP distances between *E. coli* serogroup O26 isolates (n=66); GREEN indicates larger SNP distances (dissimilar isolates), while RED indicates smaller SNP distances (very similar isolates)
